# Supplementary material
Source: Springer Nature journal article supplement (https://www.springermedizin.de/resource/supplementary/12889_2012_4616_MOESM15_ESM.pdf/9493240)

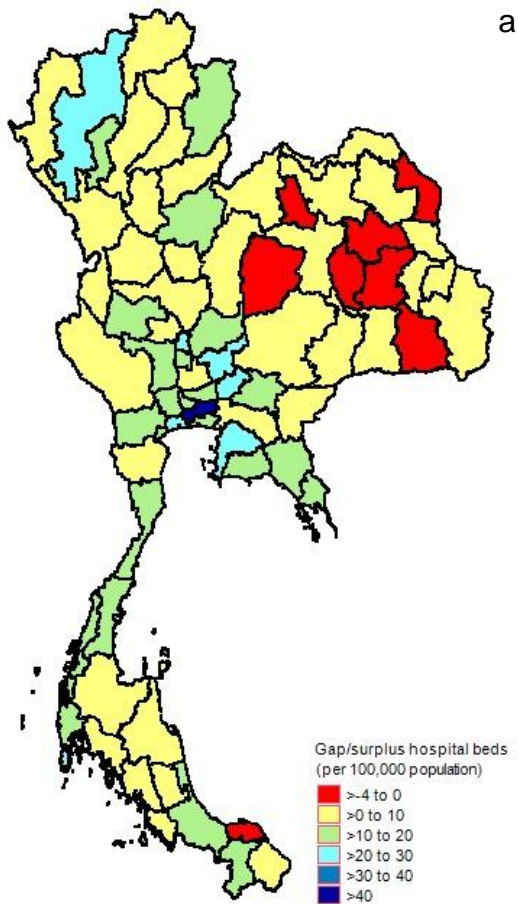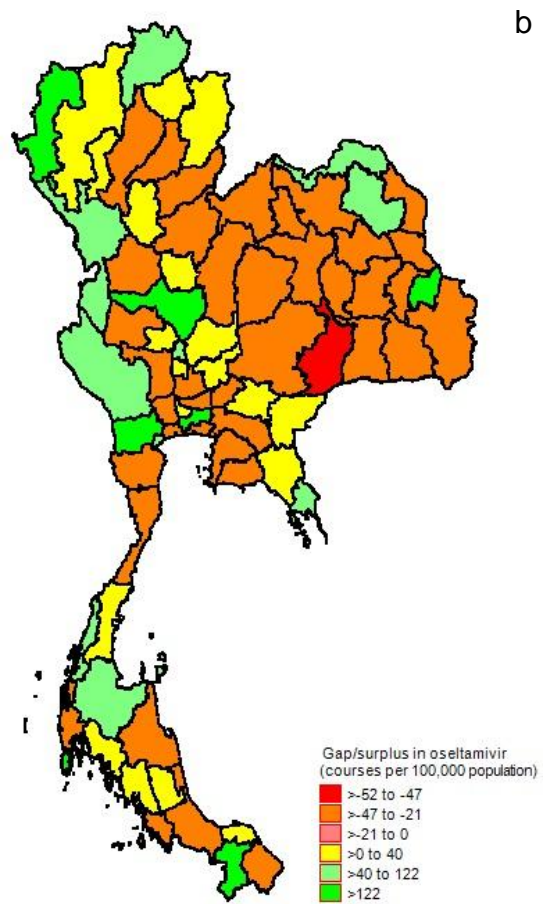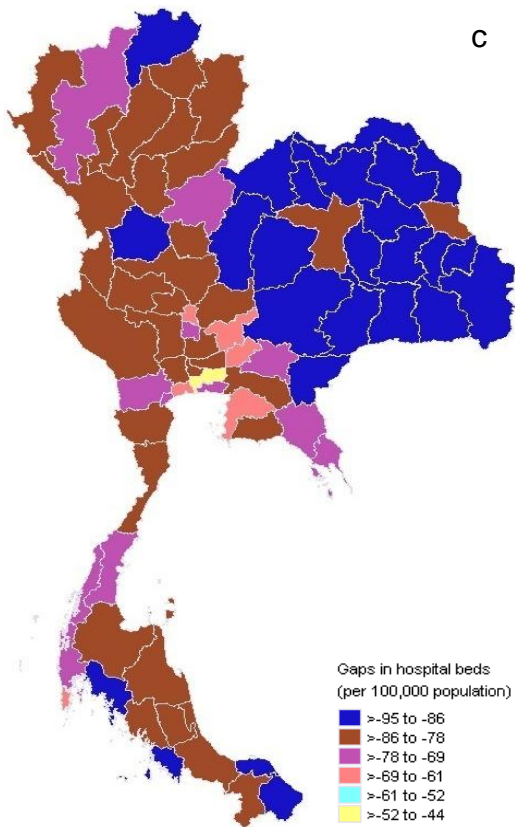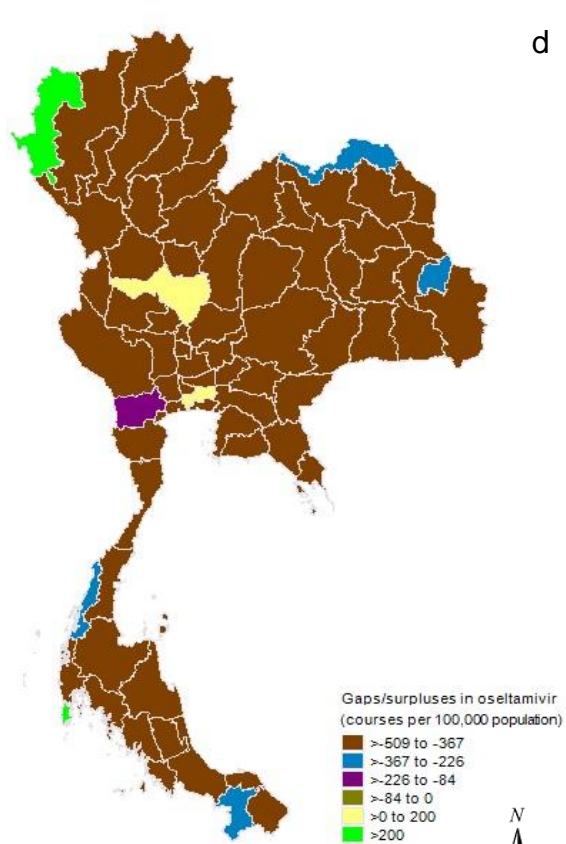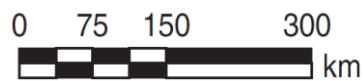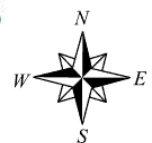

Supplement: MOESM15 [file 9493240]
